# Supplementary material for: Flavoring agent dihydrocoumarin alleviates IgE-mediated mast cell activation and allergic inflammation
Source: Royal Society of Chemistry journal article supplement (doi:10.1039/d2fo00190j), 2022-01-01
Supplement: d2fo00190j2.pdf [file d2fo00190j2.pdf]

**Supplementary Fig. 1.** F-actin staining of IgE-induced RBLs with and without DHC. (A) FITC-phalloidin stained RBLs. (B) Quantitative summary of data from 3 independent experiments; Red arrows mark activated mast cells. \* $p < 0.05$ , \*\* $p < 0.01$ , \*\*\* $p < 0.001$  vs. nontreated DHC activated cells.

**Supplementary Fig. 2.** Western blot of Sirt1 and acetylated (Ac) proteins level in IgE-induced RBLs with or without DHC. Ac proteins were detected with an antibody targeting Ac-lysine.

**Table S1.** Sequences of primers used in real-time RT-qPCR.
