# Supplementary material for: Flavoring agent dihydrocoumarin alleviates IgE-mediated mast cell activation and allergic inflammation
Source: Royal Society of Chemistry journal article supplement (doi:10.1039/d2fo00190j), 2022-01-01
Supplement: d2fo00190j3.pdf [file d2fo00190j3.pdf]

## Western blotting images

Figure 2A

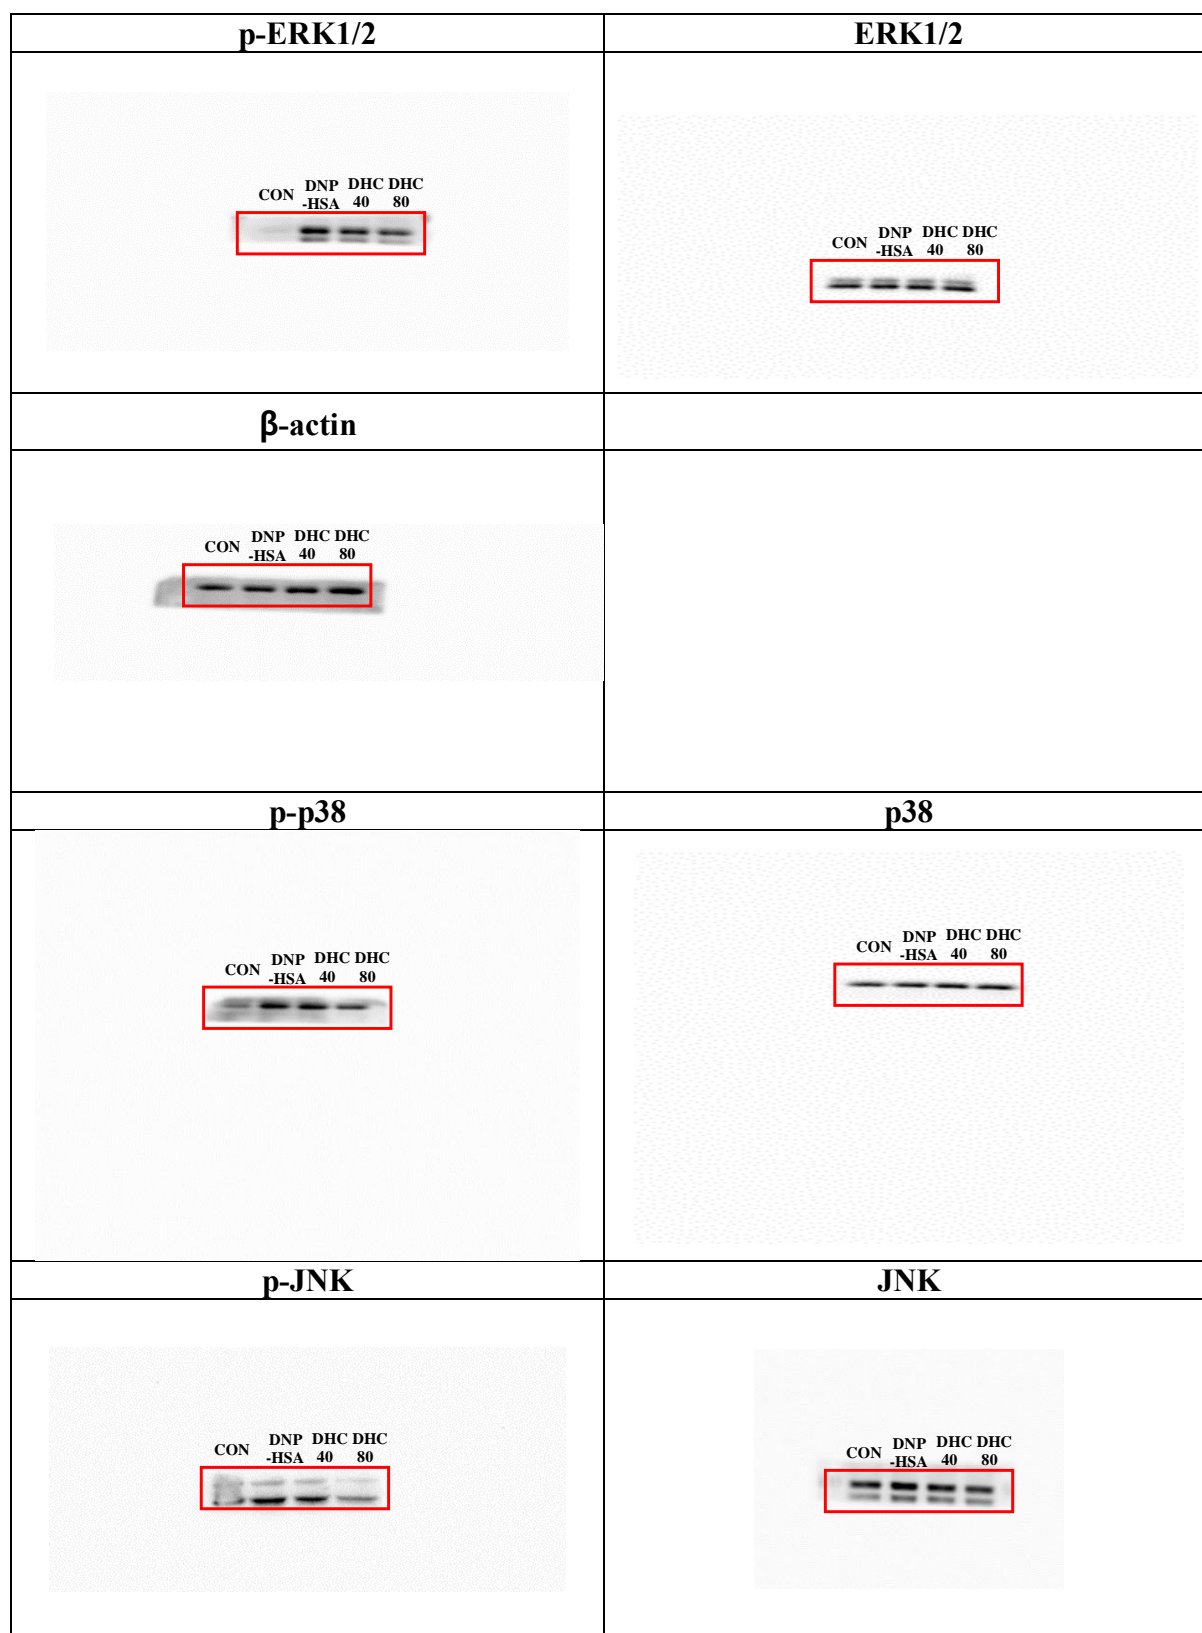

**Figure 4A**

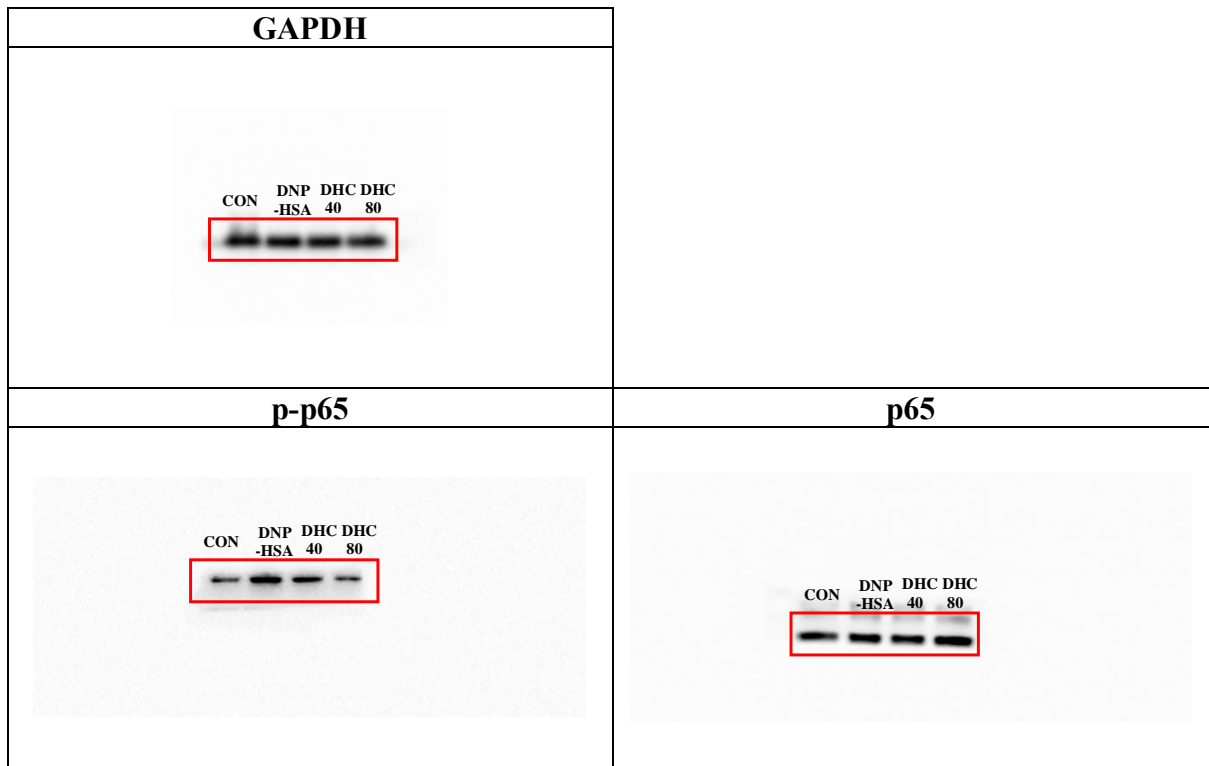

**Figure 4C**

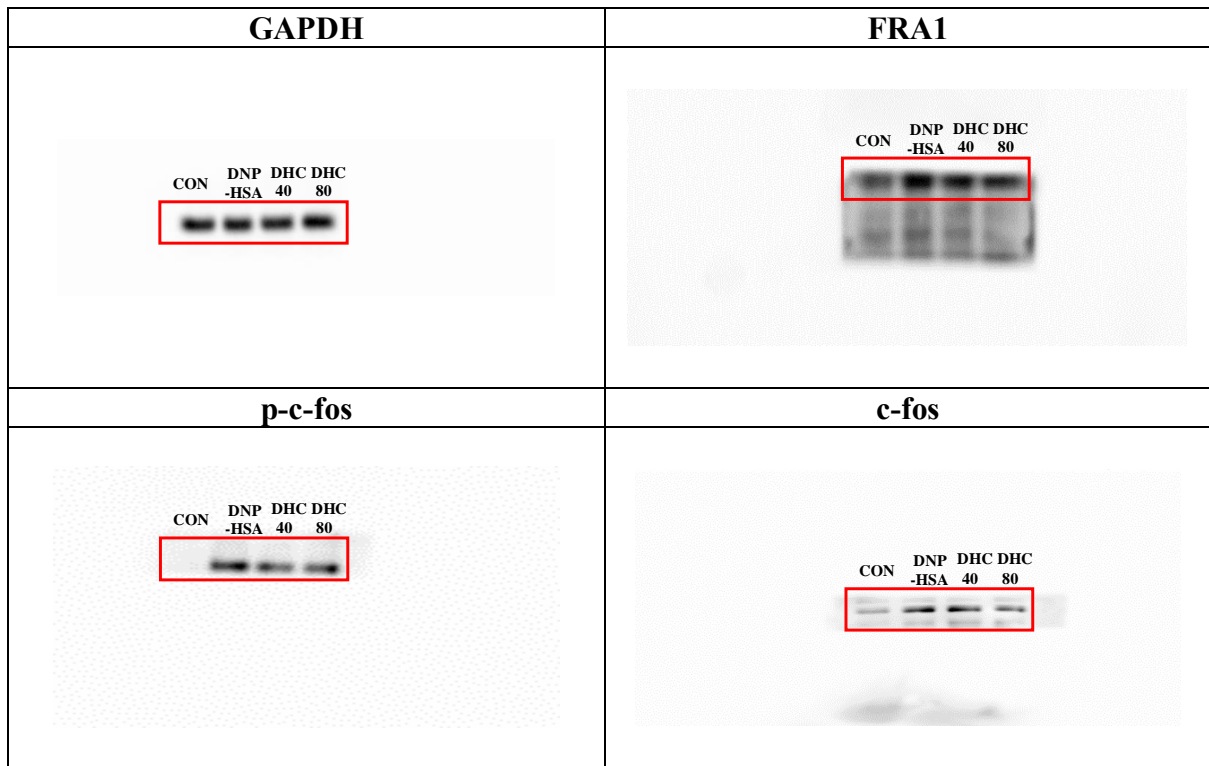

**SUPPLYMENTARY**

| <b>SIRT1</b>                                                                                                                                                                                                                                                                                                                                                                | <b>AC-lysine</b>                                                                                                                                                                                                                                                                                                                                                              |
|-----------------------------------------------------------------------------------------------------------------------------------------------------------------------------------------------------------------------------------------------------------------------------------------------------------------------------------------------------------------------------|-------------------------------------------------------------------------------------------------------------------------------------------------------------------------------------------------------------------------------------------------------------------------------------------------------------------------------------------------------------------------------|
| 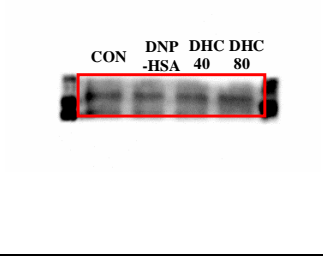 <p>Western blot analysis of SIRT1 protein levels. The blot shows four lanes: CON, DNP-HSA, DHC 40, and DHC 80. A red box highlights the bands, which appear to decrease in intensity from left to right, indicating a decrease in SIRT1 levels with increasing DHC treatment.</p>         |  <p>Western blot analysis of AC-lysine protein levels. The blot shows four lanes: CON, DNP-HSA, DHC 40, and DHC 80. A red box highlights the bands, which appear to increase in intensity from left to right, indicating an increase in AC-lysine levels with increasing DHC treatment.</p> |
| <b>GAPDH</b>                                                                                                                                                                                                                                                                                                                                                                |                                                                                                                                                                                                                                                                                                                                                                               |
|  <p>Western blot analysis of GAPDH protein levels. The blot shows four lanes: CON, DNP-HSA, DHC 40, and DHC 80. A red box highlights the bands, which appear to be of similar intensity across all lanes, indicating that GAPDH levels are consistent and serve as a loading control.</p> |                                                                                                                                                                                                                                                                                                                                                                               |
